# Supplementary material for: Electrospinning lead-free 0.5Ba(Zr0.2Ti0.8)O3–0.5(Ba0.7Ca0.3)TiO3 nanowires and their application in energy harvesting
Source: Royal Society of Chemistry journal article supplement (doi:10.1039/c3ta10792b), 2013-01-01
Supplement: c3ta10792b.pdf [file c3ta10792b.pdf]

## Electrospinning Lead-free $0.5\text{Ba}(\text{Zr}_{0.2}\text{Ti}_{0.8})\text{O}_3\text{-}0.5(\text{Ba}_{0.7}\text{Ca}_{0.3})\text{TiO}_3$ Nanowires and Their Application in Energy Harvesting

Weiwei Wu,<sup>a</sup> Li Cheng,<sup>a</sup> Suo Bai,<sup>a</sup> Wei Dou,<sup>a</sup> Qi Xu,<sup>a</sup> Zhiyang Wei,<sup>a</sup> Yong Qin,<sup>\*,a,b</sup>

<sup>a</sup> Institute of Nanoscience and Nanotechnology, Lanzhou University, Lanzhou 730000, China.

<sup>b</sup> Beijing Institute of Nanoenergy and Nanosystems, Chinese Academy of Sciences, Beijing 100085, China.

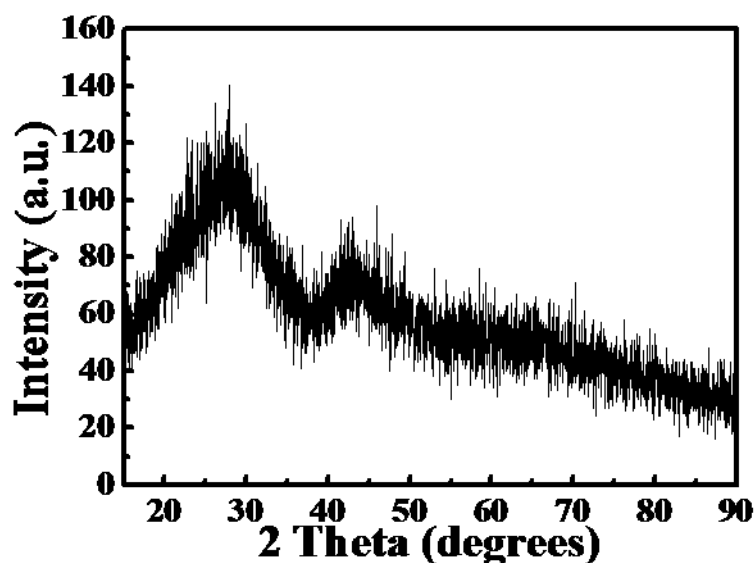

Figure S1: The XRD pattern of samples that is sintered at 440 °C.

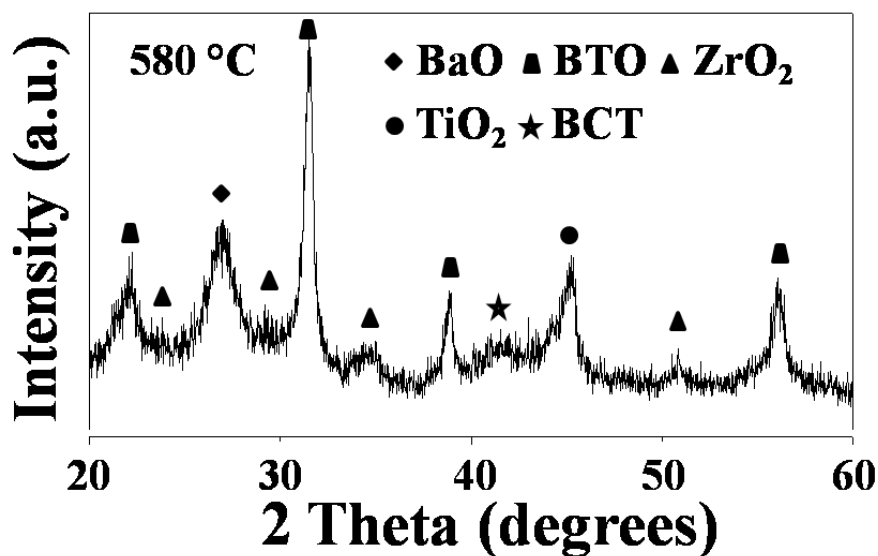

Figure S2: The XRD pattern of samples that is sintered at 580 °C.

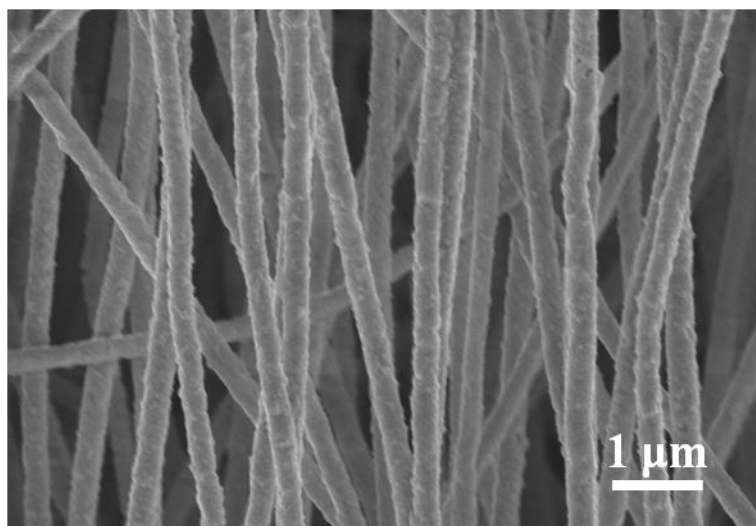

Figure S3: SEM image of the aligned BZT-BCT nanowires.
